# Supplementary material for: Prehospital Stroke Care, Paramedic Training Needs, and Hospital-Directed Feedback in Lithuania
Source: Preprints.org preprint supplement (doi:10.20944/preprints202206.0175.v2), 2022-06-16
Supplement: Supplementary file 1 [file supplementary]

# Supplementary material 1.

## A PARAMEDIC SURVEY ON PREHOSPITAL STROKE CARE, TRAINING NEEDS, AND CURRENT ATTITUDE TOWARDS LITHUANIAN STROKE NETWORK

The survey is anonymous and all collected data will be used for scientific research purposes only.

We look forward to your sincere and complete answers.

# QUESTIONNAIRE (mark the most appropriate answers)

**Q1.** WHAT IS YOUR GENDER?

1. Female
2. Male

**Q2.** WHAT IS YOUR AGE? ________ years.

**Q3.** WHICH SERVICE DO YOU WORK FOR?

1. Vilnius city EMS
2. Vilnius district EMS
3. Other (please specify) ______________________________________

**Q4.** WHAT IS YOUR HIGHEST LEVEL OF EDUCATION RELEVANT TO YOUR PARAMEDIC ROLE?

1. Community nurse
2. Paramedic
3. Medical doctor
4. Other (please specify) ______________________________________

**Q5.** HOW LONG HAVE YOU BEEN WORKING IN PREHOSPITAL CARE? __________________ years.

**Q6.** BASED ON YOUR CURRENT KNOWLEDGE OF STROKE CARE HOW WOULD YOU CLASSIFY YOUR INITIAL TRAINING?

1. Inadequate
2. Adequate
3. Excessive

**Q7.** WOULD YOU LIKE MORE TRAINING ON PREHOSPITAL STROKE CARE?

1. Yes
2. No
3. Unsure

**Q8.** DO YOU THINK PARAMEDICS AS A GROUP NEED MORE TRAINING ON PREHOSPITAL STROKE CARE?

1. Yes
2. No
3. Unsure

**Q9**. WHAT TYPE OF TRAINING WOULD YOU LIKE REGARDING STROKE GOING FORWARD?

____________________________________________________________________________________________________________________________________________________________________________________________________________________________________________________________________________________________________________________________________________________

**Q10.** WHAT TYPE OF STROKE CONTINUING PROFESSIONAL DEVELOPMENT (CPD) ACTIVITIES FOCUSSED ON STROKE HAVE YOU COMPLETED SINCE QUALIFYING AS A PARAMEDIC?

1. Ambulance service based training
2. University based training
3. Conference with stroke related content
4. Stroke specific lecture, seminar or workshop
5. Self directed learning (offline)
6. Self directed learning (online)
7. Other (please specify) ______________________________________

**Q11.** WHAT STROKE ASSESSMENT TOOLS HAVE YOU BEEN TRAINED TO USE?

1. Cincinnati Prehospital Stroke Scale (CPSS)
2. Face Arms Speech Time (FAST)
3. Los Angeles Motor Scale (LAMS)
4. Los Angeles Prehospital Stroke Screen (LAPSS)
5. Melbourne Ambulance Stroke Screen (MASS)
6. Miami Emergency Neurologic Deficit (MEND)
7. National Institutes of Health Stroke Scale (NIHSS)
8. Rapid Arterial oCclusion Evaluation (RACE)
9. Recognition of Stroke in the Emergency Room (ROSIER)
10. Other (please specify) ______________________________________

**Q12**. HOW WOULD YOU RATE YOUR CONFIDENCE WHEN DEALING WITH THE FOLLOWING TIME CRITICAL CONDITIONS?

1. STROKE
2. Very little confidence
3. Little confidence
4. Neutral
5. Confident
6. Very confident
7. SEPSIS
8. Very little confidence
9. Little confidence
10. Neutral
11. Confident
12. Very confident
13. MAJOR TRAUMA
14. Very little confidence
15. Little confidence
16. Neutral
17. Confident
18. Very confident
19. STEMI
20. Very little confidence
21. Little confidence
22. Neutral
23. Confident
24. Very confident

**Q13.** TO WHAT EXTENT DO YOU THINK THAT PREHOSPITAL ACTIONS INFLUENCE A PATIENT‘S OUTCOME IN THE FOLLOWING TIME CRITICAL CONDITIONS?

1. STROKE
2. Very little influence
3. Little influence
4. Neutral
5. Some influence
6. Very high influence
7. SEPSIS
8. Very little influence
9. Little influence
10. Neutral
11. Some influence
12. Very high influence
13. MAJOR TRAUMA
14. Very little influence
15. Little influence
16. Neutral
17. Some influence
18. Very high influence
19. STEMI
20. Very little influence
21. Little influence
22. Neutral
23. Some influence
24. Very high influence

**Q14.** HOW DO YOU THINK PREHOSPITAL CARE HAS CHANGED OVER THE COURSE OF YOUR CAREER FOR THE FOLLOWING TIME CRITICAL CONDITIONS?

1. STROKE
2. Much worse
3. Slightly worse
4. No change
5. Slightly better
6. Much better
7. SEPSIS
8. Much worse
9. Slightly worse
10. No change
11. Slightly better
12. Much better
13. MAJOR TRAUMA
14. Much worse
15. Slightly worse
16. No change
17. Slightly better
18. Much better
19. STEMI
20. Much worse
21. Slightly worse
22. No change
23. Slightly better
24. Much better

**Q15.** DO YOU GET ANY FEEDBACK ON STROKE PATIENTS YOU TREAT AND TRANSPORT?

1. Yes (formal)
2. Sometimes (informal)
3. No

**Q16.** DO YOU THINK THAT FEEDBACK ON STROKE PATIENTS YOU TREAT WOULD BE USEFUL TO YOU AS A PARAMEDIC?

1. Yes
2. No (if you have answered no, go to Q19)
3. Unsure

**Q17.** HOW WOULD YOU LIKE THE FEEDBACK AND TO WHAT LEVEL OF DETAIL?

____________________________________________________________________________________________________________________________________________________________________________________________________________________________________________________________________________________________________________________________________________________

**Q18.** HOW WOULD YOU LIKE TO RECEIVE THE FEEDBACK?

1. By telephone from the doctor that admits the patient
2. Depersonalized via email
3. During EMS morning meetings
4. Other (please specify) ______________________________________________________
   ______________________________________________________________________________________________________________________________________________

**Q19.** WOULD YOU ROUTINELY PERFORM AN ECG ON A STROKE PATIENT?

1. Yes – all stroke patients
2. Yes – only if they had chest pain
3. Not routinely

**Q20.** HOW LONG AFTER THE LAST KNOWN WELL TIME DO YOU THINK INTRAVENOUS THROMBOLYSIS CAN BE PERFORMED IN ACUTE ISCHEMIC STROKE PATIENTS?

1. <2.5 hours
2. <3.5 hours
3. <4.5 hours
4. <5.5 hours

A stroke mimic is a condition which presents like a stroke, but is actually due to different underlying pathology. Examples of stroke mimics would be the hypoglycaemic patient who presents with unilateral weakness and slurred speech or the patient with sudden onset facial weakness due to Bell's Palsy.

**Q21.** WHAT PROPORTION OF ALL PATIENTS ADMITTED BY AMBULANCE DO YOU THINK ARE ACUTE STROKE? (PLEASE SPECIFY) _____ %.

**Q22.** WHAT PROPORTION OF SUSPECTED STROKES ADMITTED BY AMBULANCE DO YOU THINK ARE STROKE MIMICS?

1. 0-9%.
2. 10-19%
3. 20-29%
4. 30-39%
5. 40-49%
6. 50-59%
7. 60-69%
8. 70-79%
9. 80-89%
10. 90-99%

**Q23.** WHAT DO YOU THINK ARE THE **THREE MOST COMMON** STROKE MIMICS SEEN IN PREHOSPITAL CARE?

1. Mental illness
2. Metabolic disorders
3. Migraine
4. Vertigo
5. Syncope
6. Headache
7. Brain tumours
8. Toxins (including alcohol)
9. Seizures
10. Sepsis

**Q24.** WHAT IS YOUR ATTITUDE REGARDING THE CURRENT LITHUANIAN STROKE CARE NETWORK, REFORMED IN 2014?

1. Very negative
2. Negative
3. Neither positive nor negative
4. Positive
5. Very positive

**Q25.** WHAT ARE THE FACTORS THAT DETERMINES YOUR CHOICE TO WHICH HOSPITAL TO TAKE A PATIENT WITH A SUSPECTED STROKE?

____________________________________________________________________________________________________________________________________________________________________________________________________________________________________________________________________________________________________________________________________________________

**Q26.** FROM YOUR EXPERIENCE, DO YOU HAVE ANY SUGGESTIONS HOW CAN LITHUANIA‘S STROKE ASSOCIATION AND NEUROLOGISTS COULD IMPROVE CARE FOR STROKE PATIENTS IN THE FUTURE?

____________________________________________________________________________________________________________________________________________________________________________________________________________________________________________________________________________________________________________________________________________________


THANK YOU FOR YOUR SINCERE ANSWERS
